# Supplementary material for: External Validation of the STONE Score, a Clinical Prediction Rule for Ureteral Stone: An Observational Multi-institutional Study
Source: PubMed Central journal article supplement — Ann Emerg Med. Author manuscript; Available in PMC 2016 Apr 1. (PMC4808407; doi:10.1016/j.annemergmed.2015.08.019), 2015-10-03
Supplement: NIHMS736143-supplement-supplement_1.pdf [file NIHMS736143-supplement-supplement_1.pdf]

**Table E1.** Strength of association between STONE score variables and ureteral stone in the validation cohort, imputed cohort, and original validation study.

| Factor                                              | Validation Cohort, OR (95% CI), N = 845 | Imputed Cohort, OR (95% CI), N = 929 | Original Study, OR (95% CI) |
|-----------------------------------------------------|-----------------------------------------|--------------------------------------|-----------------------------|
| <b>Sex</b>                                          |                                         |                                      |                             |
| Female                                              | Reference                               | Reference                            | Reference                   |
| Male                                                | 3.4 (2.3–4.8)                           | 3.3 (2.4–4.6)                        | 4.3 (3.1–6.0)               |
| <b>Timing (duration of pain to presentation), h</b> |                                         |                                      |                             |
| >24                                                 | Reference                               | Reference                            | Reference                   |
| 6–24                                                | 1.6 (1.2–2.1)                           | 1.6 (1.2–2.0)                        | 1.9 (1.3–2.7)               |
| <6                                                  | 3.1 (1.7–4.8)                           | 2.7 (1.5–5.1)                        | 6.3 (4.3–9.3)               |
| <b>Origin (race)</b>                                |                                         |                                      |                             |
| Black                                               | Reference                               | Reference                            | Reference                   |
| Nonblack                                            | 1.4 (0.9–2.2)                           | 1.4 (0.9–2.2)                        | 6.8 (3.8–12.6)              |
| <b>Nausea and vomiting</b>                          |                                         |                                      |                             |
| None                                                | Reference                               | Reference                            | Reference                   |
| Nausea alone                                        | 1.2 (0.8–1.7)                           | 1.3 (0.9–1.9)                        | 2.0 (1.4–2.9)               |
| Vomiting                                            | 2.9 (1.8–4.8)                           | 2.8 (1.8–4.5)                        | 5.3 (3.5–7.9)               |
| <b>Hematuria on urine dipstick</b>                  |                                         |                                      |                             |
| Absent                                              | Reference                               | Reference                            | Reference                   |
| Present                                             | 3.6 (1.9–6.8)                           | 3.7 (2.0–6.7)                        | 5.6 (4.0–8.0)               |

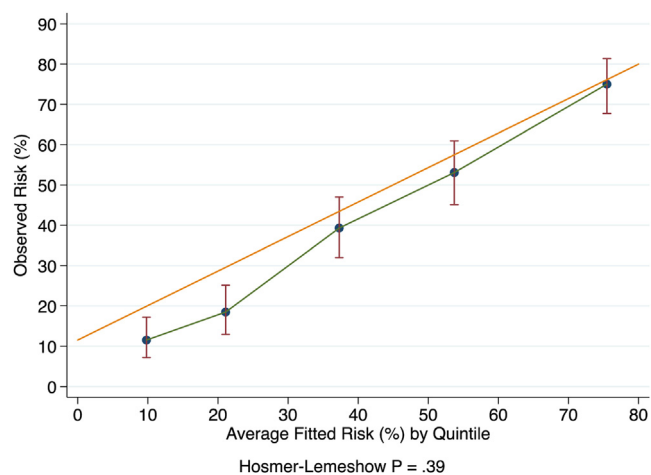

**Figure E1.** Calibration plot of the STONE score: observed versus predicted risk of ureteral stone.

**Table E2.** Strength of association between STONE score variables and ureteral stone in the black versus nonblack participants.

| Factor                                              | Validation Cohort, OR (95% CI), N = 845 | Black Participants, OR (95% CI), N = 169 | Nonblack, OR (95% CI), N = 676 |
|-----------------------------------------------------|-----------------------------------------|------------------------------------------|--------------------------------|
| <b>Sex</b>                                          |                                         |                                          |                                |
| Female                                              | Reference                               | Reference                                | Reference                      |
| Male                                                | 3.4 (2.3–4.8)                           | 2.7 (1.1–6.9)                            | 3.6 (2.2–5.6)                  |
| <b>Timing (duration of pain to presentation), h</b> |                                         |                                          |                                |
| >24                                                 | Reference                               | Reference                                | Reference                      |
| 6–24                                                | 1.6 (1.2–2.1)                           | 1.4 (1.0–1.8)                            | 1.6 (1.1–2.2)                  |
| <6                                                  | 3.1 (1.7–4.8)                           | 1.6 (0.6–4.3)                            | 3.5 (1.9–6.5)                  |
| <b>Origin (race)</b>                                |                                         |                                          |                                |
| Black                                               | Reference                               | NA                                       | NA                             |
| Nonblack                                            | 1.4 (0.9–2.2)                           |                                          |                                |
| <b>Nausea and vomiting</b>                          |                                         |                                          |                                |
| None                                                | Reference                               | Reference                                | Reference                      |
| Nausea alone                                        | 1.2 (0.8–1.7)                           | 1.4 (0.5–4.1)                            | 1.1 (0.7–1.9)                  |
| Vomiting                                            | 2.9 (1.8–4.8)                           | 4.9 (1.6–14.6)                           | 2.6 (1.4–4.6)                  |
| <b>Hematuria on urine dipstick</b>                  |                                         |                                          |                                |
| Absent                                              | Reference                               | Reference                                | Reference                      |
| Present                                             | 3.6 (1.9–6.8)                           | 2.1 (0.9–4.6)                            | 4.2 (2.2–7.8)                  |

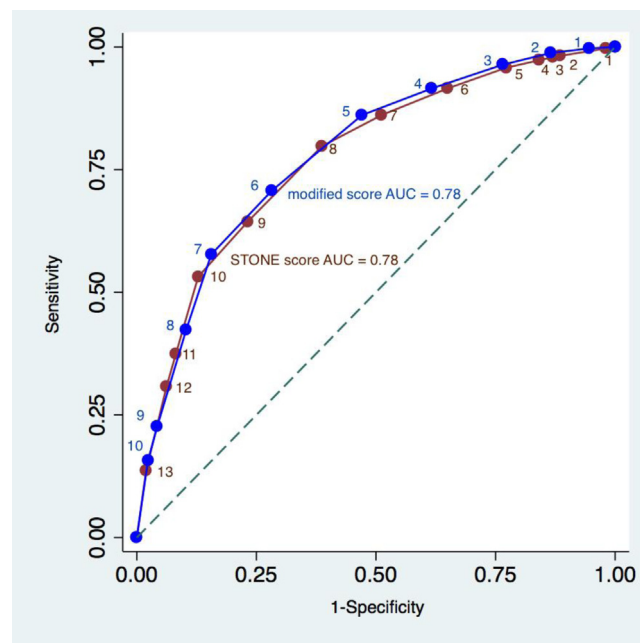

**Figure E2.** Receiver operating characteristic curve of STONE score versus modified STONE score.

**Table E3.** Test characteristics of the modified STONE score for ureteral stone.

|                       | <b>Sensitivity, % (95% CI)</b> | <b>Specificity, % (95% CI)</b> | <b>+LR, % (95% CI)</b> | <b>-LR, % (95% CI)</b> |
|-----------------------|--------------------------------|--------------------------------|------------------------|------------------------|
| Modified score (7-10) | 58 (52-63)                     | 84 (82-87)                     | 3.7 (3.0-4.6)          | 0.5 (0.4-0.6)          |
| Modified score (8-10) | 42 (37-48)                     | 90 (87-92)                     | 4.1 (3.1-5.4)          | 0.6 (0.6-0.7)          |
